# Supplementary material for: Comparative Effectiveness of Two Models of Depression Services Quality Improvement in Health and Community Sectors
Source: Atypon-hosted journal article supplement (doi:10.1176/appi.ps.201700170), 2017-11-01
Supplement: appi.ps.201700170.ds001.pdf [file appi.ps.201700170.ds001.pdf]

**Supplementary Technical Appendix for**

**Brief Report: Comparative Effectiveness of Two Models of Depression Services Quality Improvement in Health and Community Sectors**

| Table of Contents |                                 | Page |
|-------------------|---------------------------------|------|
| 1.                | Enrollment                      | 2    |
| 2                 | Telephone survey                | 2    |
| 3                 | Propensity weighting adjustment | 3    |
| 4                 | Imputation                      | 3    |
| 5                 | Sensitivity Analyses            | 4    |
| 6                 | Intervention Components         | 5    |
| 7                 | Study flow diagram              | 16   |
|                   | References for Appendix         | 17   |

## 1. Enrollment

The study settings were South Los Angeles and Hollywood-Metro. Participant sampling (program and client recruitment) and randomization are described in prior publications (1, 2). Within enrolled programs, 4649 clients were screened for eligibility, 4440 (96%) agreed to screening, 1322 (30%) were eligible, and 1246 (94% of eligible) consented. In our previous publications (1, 3), we used nonresponse weighting to address for non-enrollment among eligible clients. The enrollment weight was intended to make the enrolled sample (n=1246) representative of people who were eligible to the study. We created enrollment weights based on propensity weighting adjustment, by fitting logistic regression models to predict the enrollment among those were eligible (3, 4). The reciprocal of the predicted response probability was used as the enrollment weight for each participant. Five versions of the weight were created corresponding to five imputed screener data, because imputed predictors from the screener data were used in fitting logistic regressions. Common predictors of age, community, and sector of screening program were used in all models. See Supplementary Materials in previous publications (1, 2).

## 2. Telephone survey

Participants were invited to participant telephone surveys at baseline, 6, 12, and 36 months conducted by RAND survey staff who were blinded to intervention. Table S1 presents survey response status at each time point. Cumulatively, there were 2, 3, 9, 33 participants who were deceased at the baseline, 6-, 12-, and 36-month follow-ups. Excluded deceased cases, the completion rates relative to all initial enrollees are 79% for the baseline survey (n=981), 61% for the 6-month survey (n=759), 59% for the 12-month survey (n=733), and 49% for the 36-month survey (n= 600). Figure 1 provides the consort chart.

**Table S1. Telephone Survey Response Status by Screening Sector among Enrolled**

|                                                                    | Overall |     |     | Social-community Screening Sector |     |     | Healthcare Screening Sector |     |     |
|--------------------------------------------------------------------|---------|-----|-----|-----------------------------------|-----|-----|-----------------------------|-----|-----|
|                                                                    | Total   | RS  | CEP | Total                             | RS  | CEP | Total                       | RS  | CEP |
| Participants consented                                             | 1246    | 606 | 640 | 381                               | 183 | 198 | 865                         | 423 | 442 |
| Baseline survey 4/27/2010-1/2/2011                                 |         |     |     |                                   |     |     |                             |     |     |
| Attempted for baseline interview                                   | 1246    | 606 | 640 | 381                               | 183 | 198 | 865                         | 423 | 442 |
| Baseline completed                                                 | 981     | 492 | 489 | 293                               | 146 | 147 | 688                         | 346 | 342 |
| No baseline (36 Refused, 227 inaccessible, 2 deceased)             | 265     | 114 | 151 | 88                                | 37  | 51  | 177                         | 77  | 100 |
| 6 month follow-up survey 11/2/2010-8/11/2011                       |         |     |     |                                   |     |     |                             |     |     |
| Attempted for 6 months interview <sup>a</sup>                      | 1093    | 540 | 553 | 327                               | 161 | 166 | 766                         | 379 | 387 |
| 6 months completed                                                 | 759     | 380 | 379 | 236                               | 118 | 118 | 523                         | 262 | 261 |
| No 6 month interview (12 refused, 1 deceased, 321 inaccessible)    | 334     | 160 | 174 | 91                                | 43  | 48  | 243                         | 117 | 126 |
| 12 months follow-up survey 5/10/2011-3/12/2012                     |         |     |     |                                   |     |     |                             |     |     |
| Attempted for 12 months interview <sup>b</sup>                     | 974     | 480 | 494 | 292                               | 143 | 149 | 682                         | 337 | 345 |
| 12 months completed                                                | 733     | 364 | 369 | 239                               | 118 | 121 | 494                         | 246 | 248 |
| No 12 month interview (6 deceased, 7 refused, 228 inaccessible)    | 241     | 116 | 125 | 53                                | 25  | 28  | 188                         | 91  | 97  |
| 36 months follow-up survey 1/14/2014-10/14/2014                    |         |     |     |                                   |     |     |                             |     |     |
| Attempted for 36 months interview <sup>c</sup>                     | 1004    | 496 | 508 | 299                               | 148 | 151 | 705                         | 348 | 357 |
| 36 months completed                                                | 600     | 293 | 307 | 196                               | 94  | 102 | 404                         | 199 | 205 |
| No 36 months interview (24 deceased, 10 refused, 370 inaccessible) | 404     | 203 | 201 | 103                               | 54  | 49  | 301                         | 149 | 152 |

<sup>a</sup>N=153 were not approached for 6 months telephone survey because the baseline survey status was in one of the following categories: ill or incarceration, unable to contact, or deceased.

<sup>b</sup> N=272 were not approached for 12 months telephone survey because the previous survey status was in one of the following categories: had no data on baseline and 6 months survey, ill or incarceration, unable to contact, or deceased.

<sup>c</sup>N=242 were not approached for 36 months telephone survey because the previous survey status was in one of the following categories: had no data on any previous surveys (baseline, 6-, or 12-month), final refusal, or deceased.

Table S2 shows the distribution of unit response patterns over 36 months. Among enrolled participants (N=1248), 1019 had at least one data point at baseline, 6, 12, or 36 months while 227 had no any data across waves. We define our analytic sample to be participants who completed 1 or more surveys at baseline, 6, 12, or 36 months and alive at follow-up, resulted in analytic sample size of N=1018, 1013, 980 for 6, 12, and 36 months respectively. To control for potential nonresponse bias, we used a combination of weighting method and unit imputation to extrapolate data analyses to enrolled participants.

**Table S2. Unit Response Pattern Over Waves**

| Enrolled | Baseline | 6 months | 12 months | 36 months | N   |
|----------|----------|----------|-----------|-----------|-----|
| 1246     | 981      | 721      | 641       | 489       | 489 |
|          |          |          |           | 152       | 152 |
|          |          | 260      | 80        | 27        | 27  |
|          |          |          |           | 53        | 53  |
|          | 265      | 38       | 63        | 26        | 26  |
|          |          |          |           | 234       | 37  |
|          |          | 227      | 29        | 17        | 17  |
|          |          |          |           | 12        | 12  |
|          |          |          | 236       | 2         | 2   |
|          |          |          |           | 234       | 7   |
|          |          |          |           | 227       |     |

Shaded areas indicated available data

### 3. Propensity weighting adjustment

To control for potential nonresponse bias, we used nonresponse weighting to address missing data for subjects who completed neither baseline nor any follow-up assessment. We used a propensity weighting adjustment, by fitting logistic regression (4, 5) to address missing data for the 18% (227/1246) of participants who completed neither baseline nor any follow-up assessment. The reciprocal of the predicted probability was then used to account for attrition. For each of the 5 item-level imputation datasets, we fitted the logistic regression models separately for the two intervention arms. Common predictors were used in all models: age, gender, ethnicity, living situation, income, US born, community and type of programs. The final weights are the product of the two adjustment factors for enrollment and nonresponse. See Supplementary Materials in previous publications (1, 3).

### 4. Imputation

#### 4.1. Multiple Imputation for Item-level Missing Data

Most variables had item-level missingness rates of less than 5% except for baseline income and MINI variables. We used an extended hot deck multiple imputation technique to impute missing values for item-level nonresponse (6). With imputations stratified by intervention arms, 5 alternative imputed datasets were produced for screener, baseline, 6 month, 12 month, and 36 months follow-ups, and multiple imputation inferences were used in all analysis (7, 8). See Supplementary Materials in previous publications (1, 3).

#### 4.2. Unit-Level Multiple Imputation

We used a hot deck multiple imputation procedure based on an approximate Bayesian bootstrap method for unit-level missing data (9, 10). This model assumes that both missingness and dropout arise from mechanisms that are missing at random (MAR) in the sense defined by Rubin (7). Our imputation techniques attempted to

include information related to the missing values whenever possible. We first modeled the propensity of response at a given time point (coded 1 if response and 0 if nonresponse). In Step 2, we stratified cases based on the quintiles of the propensity scores and used the approximate Bayesian bootstrap to select donors. In practice these procedures were applied in sequence for the baseline, 6-month, 12-month, and 36-month data, with imputations stratified by two intervention arms. We started with imputing baseline. For each of the 5 item-level imputed screener datasets, we imputed a unit-level imputation baseline dataset. Limited to the analytic sample of 1018, we then used baseline variables as predictors for modeling 6, 12, and 36 months follow-up data and produced unit-level imputation datasets. In modeling the logistic regression of predicting response propensities, we started with a large set of independent variables. The baseline model included the predictors: age, gender, ethnicity, income, living situation, US born, community, and type of screening program. The 6-month models included participants characteristics assessed at screener (age, gender, ethnicity, health insurance, and type of screening program), and baseline clinic and service variables (multiple chronic conditions, alcohol abuse or use of illicit drugs, any depression care), and 12-month models included additional variables: community, PHQ-8 assessed at screener, mental wellness, homeless status at baseline. The 36-month models included age, gender, ethnicity, employment status,  $\geq 3$  chronic conditions, homeless, 12-month alcohol abuse or use of illicit drugs, no place to stay for at least two nights in the past 6 months, type of screening program, and community with additional stratum variable sector (social-community screening sector vs healthcare Screening Sector) in Step 2. Values for participants who were deceased were not imputed.

## 5. Sensitivity Analyses

To evaluate whether our findings are sensitive to the design-based approach using multiply imputed data in our primary analyses (Method-1), we conducted sensitivity analyses for 18 study outcome variables measuring clinical outcomes and depression care assessed at three follow-up time points using unweighted raw data without unit imputation. The full table for the primary analysis using the approach presented in the main text of the Brief Report is shown in Table S3.

### 5.1. Unadjusted estimates

Method-2 is unadjusted analysis based on an available-case analysis that deleted all nonresponse cases. We used Pearson's chi-squared tests for binary variables and two sample *t*-test for continuous variables for overall sample and stratified by screening sector (community or health). The results of unadjusted analyses are presented in Table S4.

Compared to the primary analysis (Method-1), the unadjusted analysis based on available-case data (Method-2) produced similar intervention effects on the primary outcomes and community-prioritized outcomes except for 6-month behavioral health hospital nights for social community clients which Method-2 has borderline significance ( $p=.057$ ). For client service utilization variables, Method-2 yielded more statistically significant findings than Method-1.

### 5.2. Longitudinal analyses

Method-3 is a longitudinal analysis using all waves of data (baseline, 6 months, 12 months, 36 months) without unit imputation (but including item imputation to permit consistent sample sizes). We adjusted the same set of baseline covariates as in the primary analysis (age, education, race/ethnicity, 12-month depressive disorder, and community). We specified a spline model, with a linear segment between baseline and the first follow-up for initial improvement, and another linear segment for the subsequent follow-ups; the 2 linear segments are specified to join at the first follow-up. In analyzing continuously scaled PCS-12 as the dependent variable, we used a 3-level, mixed-effect regression model by using SAS proc mixed. To account for the intraclass correlation due to the multilevel structure, we specified random effects at the program level, including random intercepts at program level and a spatial covariance structure at the client level to account for the unequal spacing of waves (11, 12). We utilized a generalized estimating equation (GEE) framework (13) with logistic regression models for binary outcomes and Poisson models for count data using SAS proc genmod due to

unstable estimates for program-specific random effects with SAS proc glimmix, specifying exchangeable correlation at the program level. From the estimated spline model, we developed a contrast involving a linear combination of coefficients to test an intervention effect at each end point (baseline, 6 months, 12 months, and 36 months) and a difference-in-difference defined as between intervention groups in change from baseline to 6 months, 12 months, and 36 months (i.e. estimated interaction of intervention status by time at each time point) within each sector and tested interaction of intervention by sector at each time point. The results of intervention effects on outcomes and service utilization are presented in Table S5.

Sensitivity analyses using the longitudinal model (Method-3) confirm that all interactions noted in Method-1 remain significant, except for 6-month behavioral health hospital nights which has borderline significance ( $p=.08$ ). Three additional interactions are significant in the longitudinal analysis (visits to primary care providers increased in CEP compared to RS for social-community clients (rather than health clients), any social services for depression increased in CEP compared to RS in healthcare clients but decreased in social-community clients; percent of use of any antidepressant increased under CEP over RS in social-community clients but decreased in healthcare clients). For intervention effects within community clients, significant intervention effect is confirmed by testing intervention effects in change from baseline for higher use of antidepressants and visits to primary care at 36 month under CEP and fewer behavioral health hospital nights at 6 months, and this effect on hospital nights also emerges as significant at 12 and 36 months. In addition, the tests of intervention effects at a specific follow-up time point confirm significant increases under CEP in use of probable appropriate depression treatment at 36-months. For healthcare clients, testing the intervention effects in change from baseline confirm improved MHQL ( $p=.012$ ) and mental wellness ( $p=.012$ ) at 6 months. For PHRQL, CEP has significant improvement than RS at 36 months (with  $p<.05$ ) but not in change from baseline. In addition, the tests for intervention effects in change from baseline suggest reduced mental health specialty outpatient visits received advice for medication and in use of antidepressant medication at 6 and 12 months; with end-status analyses but not in change from baseline showed significant increases under RS compared to CEP in appropriate treatment at 36 months (OR=.63, 95% CI=.4-0.1,  $p=.048$ ).

## 6. Intervention Components

The study compared two implementation models, both of which encouraged but did not require providers or clients to use particular toolkits or services for depression QI strategies (e.g., clinical assessment, psychotropic medications and/or cognitive behavioral therapy for depression, skill building for case managers and community health workers, and patient education and engagement materials). The interventions differed in ways of adapting resources and implementing training for depression services QI, based on toolkits from prior studies and available to participating programs in hardcopy, flash drives and a website (<http://www.communitypartnersincare.org/community-engagement-and-planning/>).

RS used a technical assistance approach to provide support to individual programs for depression QI, using a “train-the-trainer” model. Programs within agencies were encouraged to consider which toolkit materials were relevant to their program. Representatives from each RS program were offered training on depression QI strategies via a series of 12 phone or on-line webinars offered over a two-month period in each community, provided by a team of psychiatrists, nurse care manager, CBT trainer, QI expert, support staff and an engagement specialist to encourage participation. Representatives were encouraged to share toolkits and orient their providers/staff. In addition, for each RS primary-care site, a physician offered to make one site visit to review medication management and clinical assessment. For components requiring additional supervision, such as Cognitive Behavioral Therapy, referrals were made to local programs. QI toolkits and trainings were provided free.

CEP supported each community in developing a multi-sector “network” from participating programs to collaborate in developing a written plan for training, and implementation and monitoring of the depression QI

strategies, emphasizing collaboration across sectors in tasks such as referrals and case management. Program liaisons attended meetings twice a month during the 4-month planning period to adapt toolkits to communities and document written plans, supported by a CEP workbook on participatory principles, study intervention experts and \$15K per coalition to use for innovations in toolkit adaptations and trainings. Subsequently, liaisons met monthly for a year to oversee implementation (i.e., conferences, telephone and webinar supervision for CBT and case-management), to review progress and recommend modifications, and to develop and implement innovations. Innovations included review of alternative medicine therapies in medication management trainings, provider self-care activities to improve capacity to help consumers, “resilience classes” taught by lay persons for psychoeducation on CBT principles, and in the last several months, piloting a “Village Clinic” offering case management and resiliency classes in selected CEP sites.

**TABLE S3. Client Primary and Community-Prioritized Outcomes by Intervention Status from Intervention-by-Sector Interaction Model<sup>a</sup>**

|                                              | Social-community Screening Sector |           |              |           |                          |          |          | Healthcare Screening Sector |           |              |           |                          |         |          | Interaction<br><i>p</i> |
|----------------------------------------------|-----------------------------------|-----------|--------------|-----------|--------------------------|----------|----------|-----------------------------|-----------|--------------|-----------|--------------------------|---------|----------|-------------------------|
|                                              | RS Estimate                       |           | CEP Estimate |           | CEP vs RS                |          |          | RS Estimate                 |           | CEP Estimate |           | CEP vs RS                |         |          |                         |
|                                              | %                                 | 95%CI     | %            | 95%CI     | OR                       | 95%CI    | <i>p</i> | %                           | 95%CI     | %            | 95%CI     | OR                       | 95%CI   | <i>p</i> |                         |
| <b>Primary outcomes</b>                      |                                   |           |              |           |                          |          |          |                             |           |              |           |                          |         |          |                         |
| MCS-12 <sub>≤40</sub>                        |                                   |           |              |           |                          |          |          |                             |           |              |           |                          |         |          |                         |
| 6-mo follow-up                               | 49.5                              | 39.7-59.4 | 45.3         | 36.9-53.9 | .8                       | .5-1.4   | .511     | 52.4                        | 46.9-57.9 | 43.4         | 38.4-48.4 | .7                       | .5-.9   | .015     | .502                    |
| 12-mo follow-up                              | 55.5                              | 46.8-63.8 | 42.4         | 32.8-52.6 | .6                       | .3-1.0   | .045     | 48.3                        | 41.5-55.2 | 45.9         | 38.7-53.2 | .9                       | .7-1.2  | .530     | .131                    |
| 36-mo follow-up                              | 36.5                              | 24.5-50.3 | 40.0         | 30.0-50.9 | 1.2                      | .5-2.6   | .692     | 40.7                        | 32.1-49.9 | 47.2         | 36.1-58.5 | 1.3                      | .6-2.7  | .389     | .798                    |
| PHQ-8 <sub>≥10</sub>                         |                                   |           |              |           |                          |          |          |                             |           |              |           |                          |         |          |                         |
| 6-mo follow-up                               | 65.4                              | 53.5-75.6 | 63.1         | 53.0-72.2 | .9                       | .4-1.9   | .766     | 67.6                        | 60.7-73.8 | 60.4         | 52.7-67.6 | .7                       | .4-1.2  | .156     | .545                    |
| 12-mo follow-up                              | 59.6                              | 47.6-70.5 | 58.1         | 45.4-69.8 | .9                       | .4-2.0   | .859     | 62.9                        | 57.0-68.4 | 62.0         | 54.4-69.0 | 1.0                      | .7-1.4  | .830     | .950                    |
| 36-mo follow-up                              | 64.6                              | 49.3-77.5 | 57.6         | 48.0-66.7 | .7                       | .4-1.5   | .363     | 66.2                        | 58.0-73.6 | 69.3         | 62.5-75.3 | 1.2                      | .7-1.9  | .553     | .225                    |
| <b>Community-Prioritized outcomes</b>        |                                   |           |              |           |                          |          |          |                             |           |              |           |                          |         |          |                         |
| Mental wellness                              |                                   |           |              |           |                          |          |          |                             |           |              |           |                          |         |          |                         |
| 6-mo follow-up                               | 37.3                              | 25.6-50.7 | 45.7         | 36.8-54.9 | 1.5                      | .7-3.0   | .307     | 32.3                        | 25.9-39.3 | 45.8         | 38.6-53.1 | 1.9                      | 1.0-3.3 | .039     | .618                    |
| 12-mo follow-up                              | 46.9                              | 36.6-57.5 | 44.6         | 33.6-56.1 | .9                       | .5-1.8   | .768     | 47.5                        | 39.6-55.5 | 50.8         | 43.6-58.0 | 1.2                      | .7-1.8  | .534     | .538                    |
| 36-mo follow-up                              | 42.9                              | 28.2-58.9 | 47.5         | 32.7-62.6 | 1.2                      | .4-3.6   | .679     | 50.5                        | 39.4-61.7 | 43.5         | 36.7-50.7 | .7                       | .5-1.2  | .207     | .224                    |
| Homeless or ≥2 risk factors for homelessness |                                   |           |              |           |                          |          |          |                             |           |              |           |                          |         |          |                         |
| 6-mo follow-up                               | 42.0                              | 31.3-53.4 | 25.2         | 16.3-36.5 | .4                       | .2-.9    | .018     | 38.8                        | 31.2-47.0 | 31.5         | 24.8-38.9 | .7                       | .4-1.1  | .125     | .179                    |
| 12-mo follow-up                              | 30.2                              | 22.1-39.7 | 33.1         | 22.8-45.3 | 1.2                      | .5-2.4   | .682     | 32.5                        | 26.0-39.8 | 35.0         | 28.1-42.6 | 1.1                      | .8-1.7  | .540     | .948                    |
| 36-mo follow-up                              | 40.3                              | 30.0-51.6 | 33.7         | 20.5-49.8 | .7                       | .3-1.8   | .451     | 33.9                        | 26.1-42.6 | 35.9         | 28.6-43.9 | 1.1                      | .7-1.8  | .701     | .460                    |
| PCS-12                                       |                                   |           |              |           |                          |          |          |                             |           |              |           |                          |         |          |                         |
|                                              | Mean                              |           | Mean         |           | Between-group difference |          |          | Mean                        |           | Mean         |           | Between-group difference |         |          |                         |
| 6-mo follow-up                               | 40.1                              | 38.7-41.5 | 40.9         | 39.6-42.2 | .8                       | -.8-2.4  | .315     | 39.6                        | 38.9-40.4 | 40.1         | 39.1-41.1 | .5                       | -.8-1.7 | .440     | .740                    |
| 12-mo follow-up                              | 40.1                              | 38.8-41.4 | 40.1         | 38.8-41.3 | .0                       | -1.6-1.6 | .992     | 39.6                        | 38.5-40.6 | 40.4         | 39.3-41.5 | .8                       | -.6-2.2 | .248     | .447                    |
| 36-mo follow-up                              | 39.1                              | 37.9-40.3 | 39.2         | 38.2-40.2 | .1                       | -1.5-1.7 | .882     | 38.6                        | 37.6-39.5 | 40.2         | 39.3-41.2 | 1.6                      | .2-3.0  | .025     | .192                    |
| No. of behavioral health hospital nights     |                                   |           |              |           |                          |          |          |                             |           |              |           |                          |         |          |                         |
|                                              | Mean                              |           | Mean         |           | IRR                      |          |          | Mean                        |           | Mean         |           | IRR                      |         |          |                         |
| 6-mo follow-up                               | 1.1                               | .6-2.0    | .3           | .1-.8     | .3                       | .1-1.0   | .044     | .9                          | .4-1.9    | 1.3          | .4-4.3    | 1.5                      | .4-5.3  | .497     | .048                    |
| 12-mo follow-up                              | .3                                | .1-1.7    | .4           | .1-1.1    | 1.1                      | .3-3.8   | .916     | .3                          | .1-.4     | .4           | .2-.8     | 1.6                      | .7-3.9  | .273     | .580                    |
| 36-mo follow-up                              | 1.4                               | .4-4.1    | .3           | .0-2.1    | .2                       | .0-1.6   | .126     | 1.0                         | .1-6.2    | .2           | .1-.4     | .2                       | .0-2.0  | .174     | .915                    |

See Table 1 for variables definitions; RS=Resources for Services or individual program technical assistance; CEP=Community Engagement and Planning; data were multiply imputed (N=1018 at 6 months, 1013 at 12 months, 980 at 36 months).

<sup>a</sup>Intervention-by-Sector interaction models used multiply imputed data, weighted for eligible sample for enrollment; linear regression models for continuous variables (presented as between-group difference), logistic regression models for binary variables (presented as odds ratio, OR) or Poisson regression models for count variables (presented as incidence rate ratios, IRR), interacted of intervention condition by screening sector adjusted for baseline status of the dependent variable, age, education, race/ethnicity, 12-month depressive disorder, and community and accounted for the design effect of the cluster randomization

**TABLE S3. Client Secondary Outcomes by Intervention Status from Intervention-by-Sector Interaction Model<sup>a</sup>**

|                                                                        | Social-community Screening Sector |           |              |           |           |         |          | Healthcare Screening Sector |           |              |           |           |         |          | Interaction<br><i>p</i> |
|------------------------------------------------------------------------|-----------------------------------|-----------|--------------|-----------|-----------|---------|----------|-----------------------------|-----------|--------------|-----------|-----------|---------|----------|-------------------------|
|                                                                        | RS Estimate                       |           | CEP Estimate |           | CEP vs RS |         |          | RS Estimate                 |           | CEP Estimate |           | CEP vs RS |         |          |                         |
|                                                                        | Mean                              | 95%CI     | Mean         | 95%CI     | IRR       | 95%CI   | <i>p</i> | Mean                        | 95%CI     | Mean         | 95%CI     | IRR       | 95%CI   | <i>p</i> |                         |
| <b>Health Services</b>                                                 |                                   |           |              |           |           |         |          |                             |           |              |           |           |         |          |                         |
| No. of visits to a PCP                                                 |                                   |           |              |           |           |         |          |                             |           |              |           |           |         |          |                         |
| 6-mo follow-up                                                         | 4.0                               | 2.7-5.8   | 3.9          | 2.9-5.2   | 1.0       | .6-1.6  | .944     | 4.5                         | 3.1-6.4   | 3.9          | 3.3-4.6   | .9        | .6-1.3  | .484     | .709                    |
| 12-mo follow-up                                                        | 3.0                               | 2.3-3.9   | 3.7          | 2.7-5.1   | 1.2       | .8-1.9  | .338     | 3.2                         | 2.3-4.4   | 3.5          | 3.0-4.2   | 1.1       | .8-1.6  | .580     | .671                    |
| 36-mo follow-up                                                        | 2.4                               | 2.0-2.9   | 4.5          | 3.1-6.4   | 1.9       | 1.3-2.8 | .003     | 4.5                         | 3.0-6.7   | 4.0          | 3.2-4.9   | .9        | .6-1.4  | .578     | .035                    |
| No. of MH outpatient visits received advice for medication             |                                   |           |              |           |           |         |          |                             |           |              |           |           |         |          |                         |
| 6-mo follow-up                                                         | 2.9                               | .8-9.6    | 3.0          | 1.8-5.0   | 1.1       | .2-5.2  | .870     | 7.2                         | 4.8-10.7  | 2.7          | 2.1-3.5   | .4        | .2-.6   | <.001    | .100                    |
| 12-mo follow-up                                                        | 1.5                               | .7-3.0    | 1.8          | .9-3.5    | 1.2       | .4-3.2  | .752     | 3.3                         | 2.2-4.9   | 3.3          | 2.3-4.6   | 1.0       | .6-1.7  | .992     | .777                    |
| 36-mo follow-up                                                        | 1.5                               | .8-2.5    | 3.2          | 1.6-6.1   | 2.1       | .9-5.1  | .081     | 3.7                         | 2.1-6.4   | 3.9          | .8-16.4   | 1.0       | .4-2.6  | .956     | .243                    |
| No. of MH outpatient visits received counseling                        |                                   |           |              |           |           |         |          |                             |           |              |           |           |         |          |                         |
| 6-mo follow-up                                                         | 6.4                               | 2.7-14.6  | 5.1          | 3.3-7.8   | .8        | .3-2.5  | .684     | 9.4                         | 6.5-13.4  | 5.9          | 4.5-7.8   | .6        | .4-1.0  | .060     | .617                    |
| 12-mo follow-up                                                        | 2.3                               | 1.4-3.8   | 2.8          | 1.7-4.6   | 1.2       | .6-2.6  | .621     | 4.8                         | 3.4-6.7   | 3.8          | 2.8-5.1   | .8        | .5-1.3  | .329     | .289                    |
| 36-mo follow-up                                                        | 2.4                               | 1.3-4.4   | 4.8          | 2.6-8.6   | 2.0       | .9-4.5  | .090     | 5.0                         | 2.5-9.5   | 5.6          | 2.4-12.1  | 1.1       | .6-2.1  | .725     | .293                    |
|                                                                        | %                                 |           | %            |           | OR        |         |          | %                           |           | %            |           | OR        |         |          |                         |
| Any ER or urgent care visits                                           |                                   |           |              |           |           |         |          |                             |           |              |           |           |         |          |                         |
| 6-mo follow-up                                                         | 41.5                              | 34.7-48.5 | 40.7         | 31.5-50.5 | 1.0       | .6-1.7  | .895     | 40.1                        | 33.4-47.1 | 39.5         | 32.9-46.5 | 1.0       | .6-1.6  | .907     | .980                    |
| 12-mo follow-up                                                        | 33.4                              | 24.7-43.4 | 36.2         | 27.6-45.8 | 1.1       | .6-2.1  | .675     | 35.7                        | 30.7-40.9 | 32.8         | 25.3-41.2 | .9        | .6-1.2  | .414     | .451                    |
| 36-mo follow-up                                                        | 42.7                              | 32.6-53.4 | 36.7         | 26.8-47.6 | .8        | .5-1.3  | .294     | 40.1                        | 34.4-46.0 | 40.5         | 32.6-49.0 | 1.0       | .6-1.6  | .930     | .361                    |
| Any visit in healthcare sector                                         |                                   |           |              |           |           |         |          |                             |           |              |           |           |         |          |                         |
| 6-mo follow-up                                                         | 86.6                              | 80.5-91.1 | 84.5         | 75.5-90.8 | .8        | .4-1.8  | .646     | 90.9                        | 86.6-94.0 | 89.2         | 84.0-92.9 | .8        | .4-1.6  | .533     | .950                    |
| 12-mo follow-up                                                        | 80.2                              | 70.4-87.3 | 84.4         | 77.6-89.4 | 1.4       | .7-2.7  | .375     | 83.5                        | 78.6-87.5 | 84.5         | 78.6-89.0 | 1.1       | .7-1.8  | .770     | .592                    |
| 36-mo follow-up                                                        | 75.3                              | 67.4-81.9 | 85.8         | 76.0-92.0 | 2.0       | .9-4.5  | .082     | 87.7                        | 79.5-93.0 | 83.9         | 73.1-91.1 | .7        | .3-1.6  | .402     | .025                    |
| <b>Community Services</b>                                              |                                   |           |              |           |           |         |          |                             |           |              |           |           |         |          |                         |
| Any social services for depression                                     |                                   |           |              |           |           |         |          |                             |           |              |           |           |         |          |                         |
| 6-mo follow-up                                                         | 19.0                              | 14.0-25.4 | 13.7         | 8.8-20.6  | .7        | .3-1.3  | .203     | 17.0                        | 12.4-22.9 | 19.0         | 14.5-24.5 | 1.2       | .7-1.9  | .578     | .126                    |
| 12-mo follow-up                                                        | 12.9                              | 8.2-19.7  | 8.8          | 3.9-17.9  | .6        | .2-1.9  | .376     | 9.5                         | 5.8-14.9  | 12.7         | 9.2-17.2  | 1.4       | .7-2.8  | .315     | .133                    |
| 36-mo follow-up                                                        | 18.8                              | 11.0-29.9 | 9.3          | 3.8-20.3  | .4        | .1-1.3  | .122     | 10.5                        | 7.0-15.5  | 21.0         | 13.3-31.2 | 2.3       | 1.1-4.8 | .030     | .034                    |
| Any community sector visit for depression                              |                                   |           |              |           |           |         |          |                             |           |              |           |           |         |          |                         |
| 6-mo follow-up                                                         | 28.2                              | 21.4-36.1 | 29.4         | 22.3-37.7 | 1.1       | .6-1.8  | .813     | 29.8                        | 24.4-35.8 | 31.9         | 25.1-39.6 | 1.1       | .7-1.7  | .633     | .892                    |
| 12-mo follow-up                                                        | 20.8                              | 15.3-27.5 | 21.8         | 14.1-31.8 | 1.1       | .5-2.2  | .859     | 20.4                        | 16.1-25.5 | 24.1         | 19.5-29.3 | 1.2       | .8-1.9  | .285     | .640                    |
| 36-mo follow-up                                                        | 31.0                              | 22.1-41.5 | 25.4         | 17.1-36.0 | .8        | .4-1.4  | .337     | 27.3                        | 21.9-33.4 | 39.8         | 32.2-47.9 | 1.8       | 1.2-2.8 | .009     | .036                    |
| <b>Community and/or Healthcare service</b>                             |                                   |           |              |           |           |         |          |                             |           |              |           |           |         |          |                         |
| No. of days attended self-help or family support groups for MH problem |                                   |           |              |           |           |         |          |                             |           |              |           |           |         |          |                         |
|                                                                        | Mean                              |           | Mean         |           | IRR       |         |          | Mean                        |           | Mean         |           | IRR       |         |          |                         |



**TABLE S3. Client Secondary Outcomes by Intervention Status from Intervention-by-Sector Interaction Model<sup>a</sup>**

|                                                       | Social-community Screening Sector |           |              |           |           |         |             |      | Healthcare Screening Sector |      |           |     |        |          | Interaction<br><i>p</i> |
|-------------------------------------------------------|-----------------------------------|-----------|--------------|-----------|-----------|---------|-------------|------|-----------------------------|------|-----------|-----|--------|----------|-------------------------|
|                                                       | RS Estimate                       |           | CEP Estimate |           | CEP vs RS |         | RS Estimate |      | CEP Estimate                |      | CEP vs RS |     |        |          |                         |
|                                                       | Mean                              | 95%CI     | Mean         | 95%CI     | IRR       | 95%CI   | <i>p</i>    | Mean | 95%CI                       | Mean | 95%CI     | IRR | 95%CI  | <i>p</i> |                         |
| 6-mo follow-up                                        | 2.6                               | 1.1-6.2   | 4.3          | 2.0-9.0   | 1.6       | .5-5.1  | .395        | 6.4  | 3.5-11.2                    | 4.4  | 2.8-6.9   | .7  | .4-1.3 | .262     | .180                    |
| 12-mo follow-up                                       | 2.6                               | .8-7.8    | 6.5          | 3.0-14.0  | 2.6       | .7-10.0 | .169        | 8.8  | 6.1-12.6                    | 5.0  | 2.8-8.9   | .6  | .3-1.0 | .060     | .046                    |
| 36-mo follow-up                                       | 2.1                               | 1.0-4.3   | 6.4          | 3.5-11.4  | 3.1       | 1.2-8.1 | .024        | 7.9  | 5.1-12.1                    | 5.3  | 2.8-9.7   | .7  | .3-1.6 | .301     | .033                    |
| No. of outpatient contacts for depression all sectors |                                   |           |              |           |           |         |             |      |                             |      |           |     |        |          |                         |
| 6-mo follow-up                                        | 17.2                              | 9.4-30.9  | 21.2         | 14.5-30.8 | 1.2       | .6-2.6  | .541        | 24.9 | 17.8-34.7                   | 22.2 | 16.7-29.4 | .9  | .5-1.5 | .628     | .350                    |
| 12-mo follow-up                                       | 9.8                               | 5.6-16.9  | 17.0         | 10.5-27.5 | 1.7       | .8-3.7  | .147        | 21.9 | 17.0-28.2                   | 17.2 | 12.2-24.3 | .8  | .5-1.1 | .190     | .047                    |
| 36-mo follow-up                                       | 10.7                              | 6.9-16.5  | 17.2         | 10.9-26.9 | 1.6       | .8-3.0  | .144        | 25.8 | 19.7-33.6                   | 21.3 | 13.5-33.2 | .8  | .6-1.2 | .305     | .054                    |
| Treatment                                             |                                   |           |              |           |           |         |             |      |                             |      |           |     |        |          |                         |
| Use of any antidepressant                             | %                                 |           | %            |           | OR        |         |             | %    |                             | %    |           | OR  |        |          |                         |
| 6-mo follow-up                                        | 31.4                              | 24.4-39.2 | 30.6         | 21.0-42.2 | 1.0       | .5-2.0  | .894        | 44.0 | 34.7-53.7                   | 35.5 | 28.3-43.4 | .6  | .4-1.2 | .131     | .300                    |
| 12-mo follow-up                                       | 28.4                              | 19.6-39.2 | 30.7         | 22.0-41.0 | 1.1       | .5-2.5  | .743        | 39.3 | 32.0-47.0                   | 29.1 | 24.3-34.4 | .6  | .4-.9  | .016     | .143                    |
| 36-mo follow-up                                       | 14.2                              | 9.2-21.2  | 33.1         | 24.7-42.6 | 3.2       | 1.6-6.4 | .002        | 34.5 | 27.4-42.3                   | 24.4 | 15.8-35.3 | .6  | .3-1.2 | .135     | .011                    |
| Use of any antipsychotic                              |                                   |           |              |           |           |         |             |      |                             |      |           |     |        |          |                         |
| 6-mo follow-up                                        | 19.6                              | 13.7-27.1 | 21.7         | 14.0-31.7 | 1.2       | .5-2.8  | .710        | 26.3 | 20.7-32.7                   | 25.1 | 19.8-31.3 | .9  | .5-1.6 | .751     | .597                    |
| 12-mo follow-up                                       | 21.0                              | 12.9-32.1 | 21.5         | 14.7-30.2 | 1.0       | .4-2.5  | .928        | 27.1 | 21.2-33.9                   | 25.1 | 19.3-31.9 | .9  | .5-1.5 | .623     | .745                    |
| 36-mo follow-up                                       | 10.4                              | 4.9-20.2  | 29.4         | 18.3-43.3 | 4.0       | 1.8-9.0 | .001        | 26.2 | 20.0-33.5                   | 20.8 | 14.4-29.1 | .7  | .5-1.1 | .151     | <.001                   |
| Probable appropriate treatment <sup>b</sup>           |                                   |           |              |           |           |         |             |      |                             |      |           |     |        |          |                         |
| 6-mo follow-up                                        | 74.1                              | 65.7-81.0 | 75.5         | 67.2-82.3 | 1.1       | .6-2.1  | .802        | 77.9 | 69.6-84.5                   | 79.2 | 74.1-83.6 | 1.1 | .7-1.8 | .727     | .991                    |
| 12-mo follow-up                                       | 70.6                              | 57.1-81.3 | 73.6         | 63.0-82.0 | 1.2       | .5-2.5  | .693        | 76.6 | 71.7-80.9                   | 72.8 | 64.8-79.6 | .8  | .5-1.2 | .327     | .427                    |
| 36-mo follow-up                                       | 60.5                              | 43.9-75.2 | 76.9         | 65.7-85.4 | 2.2       | 1.1-4.5 | .033        | 72.8 | 65.1-79.4                   | 65.5 | 57.4-72.9 | .7  | .4-1.2 | .169     | .031                    |

RS=Resources for Services or individual program technical assistance; CEP=Community Engagement and Planning; data were multiply imputed (N=1018 at 6 months, 1013 at 12 months, 980 at 36 months)

<sup>a</sup>Intervention-by-Sector interaction models used multiply imputed data, weighted for eligible sample for enrollment; logistic regression models for binary variables (presented as odds ratio, OR) or Poisson regression models for count variables (presented as incidence rate ratios, IRR), interacted of intervention condition by screening sector adjusted for baseline status of the dependent variable, age, education, race/ethnicity, 12-month depressive disorder, and community and accounted for the design effect of the cluster randomization

<sup>b</sup>Probable appropriate depression treatment: Not depressed (PHQ8<10) or depression treatment (antidepressant ≥2 mo. or ≥ 4 MH or PCP depression visits)

**Table S4. Unadjusted Estimates<sup>a</sup>**

|                                                       |     |              |     | Social-community Screening Sector |                |          | Healthcare Screening Sector |                 |                 |          |
|-------------------------------------------------------|-----|--------------|-----|-----------------------------------|----------------|----------|-----------------------------|-----------------|-----------------|----------|
|                                                       | N   | % of missing | N   | RS                                | CEP            | <i>p</i> | N                           | RS              | CEP             | <i>p</i> |
| <b>Primary outcomes</b>                               |     |              |     |                                   |                |          |                             |                 |                 |          |
| MCS12 ≤ 40                                            |     |              |     | no./total (%)                     | no./total (%)  |          |                             | no./total (%)   | no./total (%)   |          |
| 6-mo follow-up                                        | 755 | .5           | 236 | 58/118 (49.2%)                    | 52/118 (44.1%) | .434     | 519                         | 140/261 (53.6%) | 114/258 (44.2%) | .031     |
| 12-mo follow-up                                       | 717 | 2.2          | 233 | 62/117 (53.0%)                    | 42/116 (36.2%) | .010     | 484                         | 119/239 (49.8%) | 118/245 (48.2%) | .720     |
| 36-mo follow-up                                       | 588 | 2.0          | 191 | 36/93 (38.7%)                     | 38/98 (38.8%)  | .993     | 397                         | 83/195 (42.6%)  | 93/202 (46.0%)  | .486     |
| PHQ8 ≥ 10                                             |     |              |     |                                   |                |          |                             |                 |                 |          |
| 6-mo follow-up                                        | 758 | .1           | 235 | 77/117 (65.8%)                    | 73/118 (61.9%) | .529     | 523                         | 177/262 (67.6%) | 162/261 (62.1%) | .189     |
| 12-mo follow-up                                       | 729 | .5           | 238 | 71/118 (60.2%)                    | 68/120 (56.7%) | .584     | 491                         | 159/244 (65.2%) | 156/247 (63.2%) | .643     |
| 36-mo follow-up                                       | 596 | .7           | 192 | 62/94 (66.0%)                     | 58/98 (59.2%)  | .332     | 404                         | 133/199 (66.8%) | 143/205 (69.8%) | .528     |
| <b>Community-prioritized (secondary)</b>              |     |              |     |                                   |                |          |                             |                 |                 |          |
| Mental wellness                                       |     |              |     |                                   |                |          |                             |                 |                 |          |
| 6-mo follow-up                                        | 758 | .1           | 236 | 45/118 (38.1%)                    | 52/118 (44.1%) | .354     | 522                         | 86/261 (33.0%)  | 121/261 (46.4%) | .002     |
| 12-mo follow-up                                       | 732 | .1           | 239 | 54/118 (45.8%)                    | 55/121 (45.5%) | .962     | 493                         | 110/246 (44.7%) | 121/247 (49.0%) | .342     |
| 36-mo follow-up                                       | 599 | .2           | 195 | 38/94 (40.4%)                     | 43/101 (42.6%) | .761     | 404                         | 94/199 (47.2%)  | 90/205 (43.9%)  | .501     |
| homeless or ≥ 2 risk factors for homelessness         |     |              |     |                                   |                |          |                             |                 |                 |          |
| 6-mo follow-up                                        | 757 | .3           | 236 | 53/118 (44.9%)                    | 27/118 (22.9%) | .000     | 521                         | 97/261 (37.2%)  | 82/260 (31.5%)  | .176     |
| 12-mo follow-up                                       | 726 | 1.0          | 236 | 39/115 (33.9%)                    | 38/121 (31.4%) | .681     | 490                         | 75/246 (30.5%)  | 85/244 (34.8%)  | .305     |
| 36-mo follow-up                                       | 599 | .2           | 195 | 38/94 (40.4%)                     | 29/101 (28.7%) | .085     | 404                         | 65/199 (32.7%)  | 74/205 (36.1%)  | .468     |
| PCS-12                                                |     |              |     | Mean ± SD                         | Mean ± SD      |          |                             | Mean ± SD       | Mean ± SD       |          |
| 6-mo follow-up                                        | 755 | .5           | 236 | 40.0 ± 7.3                        | 40.3 ± 7.5     | .792     | 519                         | 39.7 ± 7.3      | 40.3 ± 6.9      | .347     |
| 12-mo follow-up                                       | 717 | 2.2          | 233 | 39.9 ± 7.1                        | 39.1 ± 7.2     | .372     | 484                         | 39.6 ± 7.1      | 40.7 ± 6.7      | .077     |
| 36-mo follow-up                                       | 588 | 2.0          | 191 | 38.4 ± 7.6                        | 38.4 ± 7.1     | .970     | 397                         | 38.5 ± 7.1      | 40.1 ± 7.3      | .032     |
| # behavioral health hospital nights                   |     |              |     |                                   |                |          |                             |                 |                 |          |
| 6-mo follow-up                                        | 759 | 0            | 236 | 1.1 ± 4.4                         | .3 ± 1.7       | .057     | 523                         | .7 ± 4.2        | 1.2 ± 12.4      | .561     |
| 12-mo follow-up                                       | 730 | .4           | 238 | .3 ± 1.3                          | .3 ± 2.0       | .791     | 492                         | .3 ± 1.6        | .4 ± 2.9        | .384     |
| 36-mo follow-up                                       | 597 | .5           | 194 | 1.0 ± 6.9                         | .1 ± 1.0       | .208     | 403                         | 1.1 ± 13.0      | .3 ± 1.2        | .360     |
| <b>Healthcare Sector</b>                              |     |              |     |                                   |                |          |                             |                 |                 |          |
| # visits to a PCP                                     |     |              |     |                                   |                |          |                             |                 |                 |          |
| 6-mo follow-up                                        | 758 | .1           | 236 | 3.9 ± 7.3                         | 4.3 ± 6.0      | .641     | 522                         | 4.0 ± 8.2       | 3.9 ± 7.0       | .868     |
| 12-mo follow-up                                       | 729 | .5           | 239 | 3.2 ± 4.4                         | 4.0 ± 5.3      | .206     | 490                         | 3.4 ± 6.3       | 3.4 ± 5.5       | .976     |
| 36-mo follow-up                                       | 598 | .3           | 194 | 2.7 ± 3.9                         | 4.8 ± 7.2      | .015     | 404                         | 5.0 ± 11.0      | 3.5 ± 5.9       | .085     |
| # MH outpatient visits received advice for medication |     |              |     |                                   |                |          |                             |                 |                 |          |
| 6-mo follow-up                                        | 758 | .1           | 236 | 1.5 ± 3.0                         | 2.5 ± 4.6      | .064     | 522                         | 7.2 ± 23.9      | 3.1 ± 6.8       | .008     |
| 12-mo follow-up                                       | 725 | 1.1          | 236 | 1.3 ± 3.6                         | 1.8 ± 4.4      | .397     | 489                         | 3.6 ± 10.8      | 3.7 ± 9.5       | .928     |
| 36-mo follow-up                                       | 597 | .5           | 194 | 1.4 ± 4.1                         | 2.9 ± 6.6      | .063     | 403                         | 3.8 ± 11.6      | 3.1 ± 13.6      | .536     |
| # MH outpatient visits received counseling            |     |              |     |                                   |                |          |                             |                 |                 |          |
| 6-mo follow-up                                        | 758 | .1           | 236 | 4.4 ± 15.5                        | 4.7 ± 11.9     | .847     | 522                         | 9.7 ± 25.8      | 6.3 ± 11.5      | .051     |
| 12-mo follow-up                                       | 726 | 1.0          | 236 | 1.8 ± 4.6                         | 2.9 ± 7.9      | .179     | 490                         | 5.5 ± 12.5      | 4.1 ± 9.8       | .174     |
| 36-mo follow-up                                       | 564 | 6.0          | 185 | 1.9 ± 5.5                         | 4.5 ± 9.8      | .026     | 379                         | 4.8 ± 13.8      | 4.1 ± 15.0      | .641     |

**Table S4. Unadjusted Estimates<sup>a</sup>**

|                                                  | N   | % of missing | Social-community Screening Sector |                |                 |          | Healthcare Screening Sector |                 |                 |          |
|--------------------------------------------------|-----|--------------|-----------------------------------|----------------|-----------------|----------|-----------------------------|-----------------|-----------------|----------|
|                                                  |     |              | N                                 | RS             | CEP             | <i>p</i> | N                           | RS              | CEP             | <i>p</i> |
| Any ER or urgent care visits                     |     |              |                                   | no./total (%)  | no./total (%)   |          |                             | no./total (%)   | no./total (%)   |          |
| 6-mo follow-up                                   | 759 | 0            | 236                               | 52/118 (44.1%) | 49/118 (41.5%)  | .693     | 523                         | 100/262 (38.2%) | 102/261 (39.1%) | .830     |
| 12-mo follow-up                                  | 730 | .4           | 238                               | 40/117 (34.2%) | 47/121 (38.8%)  | .456     | 492                         | 89/246 (36.2%)  | 78/246 (31.7%)  | .295     |
| 36-mo follow-up                                  | 597 | .5           | 194                               | 41/94 (43.6%)  | 37/100 (37.0%)  | .348     | 403                         | 82/199 (41.2%)  | 80/204 (39.2%)  | .684     |
| Any visit in healthcare sector                   |     |              |                                   |                |                 |          |                             |                 |                 |          |
| 6-mo follow-up                                   | 758 | .1           | 236                               | 99/118 (83.9%) | 102/118 (86.4%) | .583     | 522                         | 238/262 (90.8%) | 234/260 (90.0%) | .744     |
| 12-mo follow-up                                  | 725 | 1.1          | 238                               | 92/117 (78.6%) | 104/121 (86.0%) | .139     | 487                         | 205/243 (84.4%) | 210/244 (86.1%) | .596     |
| 36-mo follow-up                                  | 597 | .5           | 194                               | 74/94 (78.7%)  | 87/100 (87.0%)  | .125     | 403                         | 181/199 (91.0%) | 171/204 (83.8%) | .031     |
| <b>Community services</b>                        |     |              |                                   |                |                 |          |                             |                 |                 |          |
| Any social services for depression               |     |              |                                   |                |                 |          |                             |                 |                 |          |
| 6-mo follow-up                                   | 757 | .3           | 236                               | 23/118 (19.5%) | 17/118 (14.4%)  | .298     | 521                         | 37/261 (14.2%)  | 51/260 (19.6%)  | .098     |
| 12-mo follow-up                                  | 728 | .7           | 238                               | 16/117 (13.7%) | 10/121 (8.3%)   | .181     | 490                         | 22/246 (8.9%)   | 28/244 (11.5%)  | .354     |
| 36-mo follow-up                                  | 595 | .8           | 193                               | 16/94 (17.0%)  | 9/99 (9.1%)     | .101     | 402                         | 23/198 (11.6%)  | 40/204 (19.6%)  | .028     |
| Any community sector visit for depression        |     |              |                                   |                |                 |          |                             |                 |                 |          |
| 6-mo follow-up                                   | 759 | 0            | 236                               | 33/118 (28.0%) | 35/118 (29.7%)  | .774     | 523                         | 72/262 (27.5%)  | 82/261 (31.4%)  | .323     |
| 12-mo follow-up                                  | 726 | 1.0          | 236                               | 25/116 (21.6%) | 26/120 (21.7%)  | .983     | 490                         | 50/246 (20.3%)  | 54/244 (22.1%)  | .625     |
| 36-mo follow-up                                  | 592 | 1.3          | 192                               | 28/93 (30.1%)  | 25/99 (25.3%)   | .452     | 400                         | 54/197 (27.4%)  | 80/203 (39.4%)  | .011     |
| <b>Community and/or Healthcare service</b>       |     |              |                                   |                |                 |          |                             |                 |                 |          |
| # days self-help visit for mental health         |     |              |                                   |                |                 |          |                             |                 |                 |          |
| 6-mo follow-up                                   | 759 | 0            | 236                               | 1.3 ± 4.7      | 3.9 ± 14.4      | .065     | 523                         | 6.6 ± 23.9      | 4.4 ± 16.4      | .210     |
| 12-mo follow-up                                  | 730 | .4           | 238                               | 1.4 ± 11.1     | 6.1 ± 22.3      | .044     | 492                         | 10.7 ± 29.3     | 5.6 ± 18.9      | .022     |
| 36-mo follow-up                                  | 598 | .3           | 194                               | 2.5 ± 9.7      | 6.9 ± 19.2      | .048     | 404                         | 8.5 ± 21.2      | 5.2 ± 13.1      | .060     |
| # outpatient contacts for depression all sectors |     |              |                                   | Mean ± SD      | Mean ± SD       |          |                             | Mean ± SD       | Mean ± SD       |          |
| 6-mo follow-up                                   | 759 | 0            | 236                               | 12.1 ± 31.1    | 21.3 ± 43.6     | .066     | 523                         | 25.1 ± 52.0     | 21.8 ± 44.1     | .436     |
| 12-mo follow-up                                  | 719 | 1.9          | 234                               | 7.1 ± 23.9     | 17.4 ± 37.4     | .013     | 485                         | 25.3 ± 49.3     | 18.3 ± 41.8     | .093     |
| 36-mo follow-up                                  | 588 | 2.0          | 191                               | 10.9 ± 23.4    | 17.3 ± 32.2     | .123     | 397                         | 25.6 ± 53.0     | 19.3 ± 40.8     | .185     |
| <b>Treatment</b>                                 |     |              |                                   |                |                 |          |                             |                 |                 |          |
| Use of any antidepressant                        |     |              |                                   |                |                 |          |                             |                 |                 |          |
| 6-mo follow-up                                   | 757 | .3           | 235                               | 29/118 (24.6%) | 38/117 (32.5%)  | .180     | 522                         | 124/262 (47.3%) | 97/260 (37.3%)  | .021     |
| 12-mo follow-up                                  | 730 | .4           | 239                               | 26/118 (22.0%) | 40/121 (33.1%)  | .057     | 491                         | 104/246 (42.3%) | 71/245 (29.0%)  | .002     |
| 36-mo follow-up                                  | 600 | 0            | 196                               | 14/94 (14.9%)  | 35/102 (34.3%)  | .002     | 404                         | 77/199 (38.7%)  | 53/205 (25.9%)  | .006     |
| Use of any antipsychotic                         |     |              |                                   |                |                 |          |                             |                 |                 |          |
| 6-mo follow-up                                   | 757 | .3           | 235                               | 17/118 (14.4%) | 25/117 (21.4%)  | .164     | 522                         | 72/262 (27.5%)  | 74/260 (28.5%)  | .803     |
| 12-mo follow-up                                  | 730 | .4           | 239                               | 17/118 (14.4%) | 25/121 (20.7%)  | .204     | 491                         | 69/246 (28.0%)  | 68/245 (27.8%)  | .942     |
| 36-mo follow-up                                  | 600 | 0            | 196                               | 9/94 (9.6%)    | 28/102 (27.5%)  | .001     | 404                         | 56/199 (28.1%)  | 46/205 (22.4%)  | .187     |
| Appropriate treatment                            |     |              |                                   |                |                 |          |                             |                 |                 |          |
| 6-mo follow-up                                   | 754 | .7           | 235                               | 82/117 (70.1%) | 91/118 (77.1%)  | .221     | 519                         | 210/262 (80.2%) | 209/257 (81.3%) | .735     |
| 12-mo follow-up                                  | 727 | .8           | 237                               | 79/117 (67.5%) | 90/120 (75.0%)  | .203     | 490                         | 191/244 (78.3%) | 181/246 (73.6%) | .224     |
| 36-mo follow-up                                  | 598 | .3           | 194                               | 56/94 (59.6%)  | 79/100 (79.0%)  | .003     | 404                         | 150/199 (75.4%) | 131/205 (63.9%) | .012     |

**Table S4. Unadjusted Estimates<sup>a</sup>**

|   |              |   | Social-community Screening Sector |     |          | Healthcare Screening Sector |    |     |          |
|---|--------------|---|-----------------------------------|-----|----------|-----------------------------|----|-----|----------|
| N | % of missing | N | RS                                | CEP | <i>p</i> | N                           | RS | CEP | <i>p</i> |

<sup>a</sup>unadjusted analysis with Chi-square test for a binary variable and t-test for a continuously scaled variable, using available data without imputation and weighting adjustment

**TABLE S5. Longitudinal Analyses for Alternative Modeling of Intervention Effects on Outcomes and Utilizations<sup>a</sup>**

|                                                      | Social-community Screening Sector |            |      |                                   |            |       | Healthcare Screening Sector |           |       |                                   |           |      |             |
|------------------------------------------------------|-----------------------------------|------------|------|-----------------------------------|------------|-------|-----------------------------|-----------|-------|-----------------------------------|-----------|------|-------------|
|                                                      | CEP vs RS at specific time        |            |      | CEP vs RS in change from baseline |            |       | CEP vs RS at specific time  |           |       | CEP vs RS in change from baseline |           |      | Interaction |
|                                                      | Test                              | 95%CI      | p    | Test                              | 95%CI      | p     | Test                        | 95%CI     | p     | Test                              | 95%CI     | p    |             |
| <b>Primary outcomes</b>                              |                                   |            |      |                                   |            |       |                             |           |       |                                   |           |      |             |
| <b>MCS12 ≤ 40</b>                                    | OR                                |            |      | OR                                |            |       | OR                          |           |       | OR                                |           |      |             |
| Baseline                                             | .63                               | .38-1.05   | .076 |                                   |            |       | 1.18                        | .87-1.61  | .296  |                                   |           |      | .044        |
| 6-mo follow-up                                       | .69                               | .41-1.16   | .166 | 1.09                              | .59-2.01   | .777  | .69                         | .53-.89   | .004  | .58                               | .38-.89   | .012 | .98         |
| 12-mo follow-up                                      | .75                               | .52-1.08   | .116 | 1.18                              | .67-2.07   | .576  | .89                         | .73-1.09  | .273  | .76                               | .53-1.08  | .128 | .405        |
| 36-mo follow-up                                      | .8                                | .49-1.31   | .382 | 1.27                              | .62-2.59   | .519  | 1.16                        | .83-1.62  | .395  | .98                               | .64-1.49  | .927 | .239        |
| <b>PHQ8 ≥ 10</b>                                     | OR                                |            |      | OR                                |            |       | OR                          |           |       | OR                                |           |      |             |
| Baseline                                             | 1.34                              | .21-8.34   | .755 |                                   |            |       | 1.43                        | .51-3.95  | .495  |                                   |           |      | .953        |
| 6-mo follow-up                                       | .91                               | .45-1.85   | .797 | .68                               | .07-6.46   | .738  | .76                         | .52-1.1   | .147  | .53                               | .18-1.55  | .245 | .656        |
| 12-mo follow-up                                      | .81                               | .46-1.45   | .483 | .61                               | .07-5.08   | .647  | .93                         | .66-1.31  | .687  | .65                               | .22-1.98  | .451 | .697        |
| 36-mo follow-up                                      | .73                               | .41-1.29   | .28  | .54                               | .07-4.14   | .557  | 1.15                        | .72-1.85  | .561  | .81                               | .24-2.67  | .725 | .241        |
| <b>Community-prioritized (secondary)</b>             |                                   |            |      |                                   |            |       |                             |           |       |                                   |           |      |             |
| <b>Mental wellness</b>                               | OR                                |            |      | OR                                |            |       | OR                          |           |       | OR                                |           |      |             |
| Baseline                                             | 1.03                              | .64-1.66   | .902 |                                   |            |       | 1.01                        | .7-1.44   | .969  |                                   |           |      | .941        |
| 6-mo follow-up                                       | 1.24                              | .65-2.35   | .513 | 1.2                               | .64-2.27   | .57   | 1.8                         | 1.28-2.53 | <.001 | 1.79                              | 1.14-2.82 | .012 | .314        |
| 12-mo follow-up                                      | 1.1                               | .76-1.61   | .61  | 1.07                              | .73-1.58   | .732  | 1.24                        | .92-1.68  | .16   | 1.23                              | .8-1.9    | .342 | .635        |
| 36-mo follow-up                                      | .98                               | .58-1.67   | .946 | .95                               | .55-1.66   | .865  | .86                         | .55-1.32  | .484  | .85                               | .5-1.46   | .555 | .7          |
| <b>homeless or ≥ 2 risk factors for homelessness</b> | OR                                |            |      | OR                                |            |       | OR                          |           |       | OR                                |           |      |             |
| Baseline                                             | .5                                | .25-1.01   | .055 |                                   |            |       | .91                         | .63-1.31  | .61   |                                   |           |      | .143        |
| 6-mo follow-up                                       | .56                               | .28-1.12   | .103 | 1.11                              | .67-1.83   | .682  | .76                         | .53-1.1   | .15   | .84                               | .63-1.11  | .223 | .451        |
| 12-mo follow-up                                      | .73                               | .44-1.23   | .238 | 1.45                              | .9-2.35    | .127  | .92                         | .63-1.34  | .655  | 1.01                              | .7-1.45   | .962 | .491        |
| 36-mo follow-up                                      | .96                               | .54-1.7    | .888 | 1.9                               | .95-3.83   | .071  | 1.1                         | .64-1.9   | .72   | 1.21                              | .68-2.16  | .509 | .73         |
| <b>PCS-12 (+)</b>                                    | Between-group difference          |            |      | Difference-in-difference          |            |       | Between-group difference    |           |       | Difference-in-difference          |           |      |             |
| Baseline                                             | -.41                              | -2.43-1.62 | .694 | .                                 |            |       | .45                         | -.96-1.85 | .531  |                                   |           |      | .496        |
| 6-mo follow-up                                       | .41                               | -1.72-2.53 | .706 | .81                               | -1.08-2.7  | .398  | .51                         | -.98-2.01 | .5    | .07                               | -1.2-1.33 | .919 | .937        |
| 12-mo follow-up                                      | .09                               | -1.6-1.79  | .914 | .5                                | -1.24-2.24 | .574  | 1.05                        | -.19-2.29 | .096  | .6                                | -.56-1.76 | .309 | .371        |
| 36-mo follow-up                                      | -.22                              | -2.31-1.87 | .836 | .18                               | -2.19-2.56 | .879  | 1.59                        | .07-3.1   | .04   | 1.14                              | -.46-2.74 | .163 | .17         |
| <b># behavioral health hospital nights</b>           | IRR                               |            |      | IRR                               |            |       | IRR                         |           |       | IRR                               |           |      |             |
| Baseline                                             | 2.66                              | 1.09-6.48  | .031 |                                   |            |       | .69                         | .34-1.42  | .316  |                                   |           |      | .021        |
| 6-mo follow-up                                       | .39                               | .11-1.46   | .163 | .15                               | .04-.54    | .004  | 2.16                        | .54-8.61  | .276  | 3.1                               | .73-13.25 | .126 | .08         |
| 12-mo follow-up                                      | .31                               | .11-.86    | .024 | .12                               | .04-.33    | <.001 | .7                          | .28-1.75  | .44   | 1.0                               | .36-2.81  | .997 | .25         |
| 36-mo follow-up                                      | .25                               | .06-1.03   | .055 | .09                               | .02-.4     | .002  | .22                         | .03-1.56  | .131  | .32                               | .04-2.39  | .269 | .935        |
| <b>Healthcare Sector</b>                             |                                   |            |      |                                   |            |       |                             |           |       |                                   |           |      |             |
| <b># visits to a PCP</b>                             | IRR                               |            |      | IRR                               |            |       | IRR                         |           |       | IRR                               |           |      |             |
| Baseline                                             | 1.06                              | .77-1.47   | .708 |                                   |            |       | 1.04                        | .8-1.36   | .771  |                                   |           |      | .917        |
| 6-mo follow-up                                       | 1.08                              | .71-1.63   | .72  | 1.01                              | .73-1.4    | .936  | 1.01                        | .74-1.37  | .951  | .97                               | .67-1.4   | .872 | .802        |
| 12-mo follow-up                                      | 1.4                               | 1.08-1.81  | .012 | 1.31                              | .99-1.74   | .061  | .85                         | .65-1.12  | .258  | .82                               | .62-1.09  | .179 | .01         |
| 36-mo follow-up                                      | 1.81                              | 1.25-2.62  | .002 | 1.7                               | 1.05-2.75  | .03   | .72                         | .47-1.11  | .142  | .7                                | .46-1.04  | .078 | .002        |

**TABLE S5. Longitudinal Analyses for Alternative Modeling of Intervention Effects on Outcomes and Utilizations<sup>a</sup>**

|                                                  | Social-community Screening Sector |           |      |                                   |          |      | Healthcare Screening Sector |          |       |                                   |          |       |                  |
|--------------------------------------------------|-----------------------------------|-----------|------|-----------------------------------|----------|------|-----------------------------|----------|-------|-----------------------------------|----------|-------|------------------|
|                                                  | CEP vs RS at specific time        |           |      | CEP vs RS in change from baseline |          |      | CEP vs RS at specific time  |          |       | CEP vs RS in change from baseline |          |       | Interaction<br>p |
|                                                  | Test                              | 95%CI     | p    | Test                              | 95%CI    | p    | Test                        | 95%CI    | p     | Test                              | 95%CI    | p     |                  |
| # MH outpatient visits received                  | IRR                               |           |      | IRR                               |          |      | IRR                         |          |       | IRR                               |          |       |                  |
| advice for medication                            | IRR                               |           |      | IRR                               |          |      | IRR                         |          |       | IRR                               |          |       |                  |
| Baseline                                         | 1.85                              | .93-3.68  | .081 |                                   |          |      | 1.05                        | .67-1.62 | .843  |                                   |          |       | .172             |
| 6-mo follow-up                                   | 1.47                              | .69-3.14  | .314 | .8                                | .56-1.13 | .208 | .48                         | .31-.73  | <.001 | .46                               | .3-.68   | <.001 | .011             |
| 12-mo follow-up                                  | 1.62                              | .86-3.05  | .135 | .88                               | .59-1.3  | .511 | .69                         | .45-1.08 | .107  | .66                               | .45-.99  | .044  | .032             |
| 36-mo follow-up                                  | 1.78                              | .85-3.73  | .128 | .96                               | .47-1.96 | .917 | 1.01                        | .47-2.17 | .97   | .97                               | .47-2.01 | .936  | .3               |
| # MH outpatient visits received counseling       | IRR                               |           |      | IRR                               |          |      | IRR                         |          |       | IRR                               |          |       |                  |
| Baseline                                         | 1.83                              | .85-3.95  | .124 |                                   |          |      | 1                           | .63-1.59 | .994  |                                   |          |       | .189             |
| 6-mo follow-up                                   | 1.09                              | .4-2.99   | .862 | .6                                | .31-1.14 | .116 | .65                         | .42-1.02 | .061  | .65                               | .46-.92  | .015  | .358             |
| 12-mo follow-up                                  | 1.67                              | .83-3.37  | .149 | .91                               | .6-1.4   | .678 | .79                         | .51-1.22 | .281  | .79                               | .52-1.2  | .259  | .072             |
| 36-mo follow-up                                  | 2.56                              | 1.16-5.68 | .021 | 1.4                               | .64-3.07 | .4   | .95                         | .47-1.9  | .882  | .95                               | .46-1.97 | .884  | .064             |
| Any ER or urgent care visits                     | OR                                |           |      | OR                                |          |      | OR                          |          |       | OR                                |          |       |                  |
| Baseline                                         | .85                               | .5-1.46   | .564 | .                                 |          |      | 1.04                        | .74-1.47 | .821  |                                   |          |       | .539             |
| 6-mo follow-up                                   | 1.02                              | .64-1.63  | .932 | 1.19                              | .75-1.91 | .459 | .99                         | .72-1.35 | .931  | .95                               | .67-1.33 | .758  | .907             |
| 12-mo follow-up                                  | .92                               | .61-1.39  | .699 | 1.08                              | .68-1.72 | .751 | .93                         | .73-1.18 | .545  | .89                               | .64-1.24 | .496  | .976             |
| 36-mo follow-up                                  | .83                               | .49-1.42  | .499 | .97                               | .53-1.8  | .933 | .87                         | .62-1.24 | .45   | .84                               | .53-1.32 | .448  | .884             |
| Any visit in healthcare sector                   | OR                                |           |      | OR                                |          |      | OR                          |          |       | OR                                |          |       |                  |
| Baseline                                         | 1.31                              | .62-2.74  | .48  |                                   |          |      | 1.07                        | .48-2.37 | .87   |                                   |          |       | .72              |
| 6-mo follow-up                                   | 1.22                              | .58-2.58  | .603 | .93                               | .54-1.63 | .808 | 1.34                        | .75-2.39 | .326  | 1.25                              | .66-2.39 | .496  | .848             |
| 12-mo follow-up                                  | 1.38                              | .77-2.49  | .283 | 1.06                              | .63-1.77 | .833 | 1.1                         | .7-1.71  | .688  | 1.02                              | .51-2.05 | .945  | .536             |
| 36-mo follow-up                                  | 1.56                              | .82-2.98  | .176 | 1.2                               | .59-2.44 | .622 | .9                          | .52-1.54 | .694  | .84                               | .35-2.03 | .697  | .196             |
| <b>Community Services</b>                        |                                   |           |      |                                   |          |      |                             |          |       |                                   |          |       |                  |
| Any social services for depression               | OR                                |           |      | OR                                |          |      | OR                          |          |       | OR                                |          |       |                  |
| Baseline                                         | .57                               | .32-1.05  | .071 |                                   |          |      | 1.31                        | .92-1.85 | .133  |                                   |          |       | .022             |
| 6-mo follow-up                                   | .64                               | .31-1.3   | .219 | 1.11                              | .61-2.04 | .729 | 1.4                         | .83-2.36 | .206  | 1.07                              | .58-1.97 | .823  | .081             |
| 12-mo follow-up                                  | .49                               | .24-1     | .05  | .86                               | .48-1.55 | .608 | 1.56                        | .99-2.46 | .057  | 1.19                              | .72-1.98 | .498  | .009             |
| 36-mo follow-up                                  | .38                               | .14-.99   | .048 | .66                               | .28-1.58 | .349 | 1.73                        | .85-3.54 | .133  | 1.32                              | .65-2.71 | .441  | .019             |
| Any community sector visit for depression        | OR                                |           |      | OR                                |          |      | OR                          |          |       | OR                                |          |       |                  |
| Baseline                                         | .67                               | .35-1.26  | .211 |                                   |          |      | 1.3                         | .92-1.83 | .131  |                                   |          |       | .069             |
| 6-mo follow-up                                   | 1                                 | .56-1.78  | .997 | 1.5                               | .8-2.82  | .205 | 1.05                        | .71-1.56 | .801  | .81                               | .53-1.24 | .33   | .89              |
| 12-mo follow-up                                  | .79                               | .51-1.22  | .28  | 1.18                              | .69-2    | .54  | 1.26                        | .9-1.75  | .175  | .96                               | .65-1.43 | .859  | .1               |
| 36-mo follow-up                                  | .62                               | .34-1.12  | .11  | .93                               | .47-1.83 | .823 | 1.5                         | .92-2.45 | .105  | 1.15                              | .66-2.01 | .617  | .031             |
| <b>Community and/or Healthcare service</b>       |                                   |           |      |                                   |          |      |                             |          |       |                                   |          |       |                  |
| # days self-help visit for MH                    | IRR                               |           |      | IRR                               |          |      | IRR                         |          |       | IRR                               |          |       |                  |
| Baseline                                         | 1.83                              | .47-7.14  | .382 |                                   |          |      | .86                         | .41-1.78 | .68   |                                   |          |       | .335             |
| 6-mo follow-up                                   | 3.03                              | 1-9.17    | .049 | 1.65                              | .51-5.38 | .402 | .69                         | .38-1.25 | .218  | .8                                | .37-1.76 | .586  | .021             |
| 12-mo follow-up                                  | 2.7                               | 1.21-6.03 | .015 | 1.47                              | .41-5.31 | .554 | .67                         | .43-1.03 | .068  | .78                               | .38-1.59 | .487  | .003             |
| 36-mo follow-up                                  | 2.4                               | .9-6.44   | .081 | 1.31                              | .25-7    | .751 | .64                         | .38-1.08 | .094  | .75                               | .34-1.67 | .479  | .02              |
| # outpatient contacts for depression all sectors | IRR                               |           |      | IRR                               |          |      | IRR                         |          |       | IRR                               |          |       |                  |

**TABLE S5. Longitudinal Analyses for Alternative Modeling of Intervention Effects on Outcomes and Utilizations<sup>a</sup>**

|                           | Social-community Screening Sector |           |      |                                   |           |      | Healthcare Screening Sector |          |      |                                   |          |       |             |
|---------------------------|-----------------------------------|-----------|------|-----------------------------------|-----------|------|-----------------------------|----------|------|-----------------------------------|----------|-------|-------------|
|                           | CEP vs RS at specific time        |           |      | CEP vs RS in change from baseline |           |      | CEP vs RS at specific time  |          |      | CEP vs RS in change from baseline |          |       | Interaction |
|                           | Test                              | 95%CI     | p    | Test                              | 95%CI     | p    | Test                        | 95%CI    | p    | Test                              | 95%CI    | p     |             |
| Baseline                  | 1.13                              | .56-2.31  | .733 |                                   |           |      | .89                         | .62-1.27 | .508 |                                   |          |       | .547        |
| 6-mo follow-up            | 1.81                              | .78-4.17  | .164 | 1.6                               | .87-2.93  | .128 | .86                         | .58-1.27 | .453 | .97                               | .68-1.39 | .88   | .114        |
| 12-mo follow-up           | 1.65                              | .88-3.11  | .118 | 1.46                              | .9-2.37   | .123 | .79                         | .56-1.12 | .19  | .89                               | .63-1.28 | .536  | .045        |
| 36-mo follow-up           | 1.51                              | .76-3.01  | .24  | 1.34                              | .67-2.66  | .41  | .73                         | .47-1.12 | .149 | .82                               | .51-1.31 | .409  | .078        |
| <b>Treatment</b>          |                                   |           |      |                                   |           |      |                             |          |      |                                   |          |       |             |
| Use of any antidepressant | OR                                |           |      | OR                                |           |      | OR                          |          |      | OR                                |          |       |             |
| Baseline                  | 1.2                               | .61-2.39  | .595 | .                                 |           |      | 1.11                        | .7-1.76  | .649 |                                   |          |       | .852        |
| 6-mo follow-up            | 1.01                              | .47-2.17  | .97  | .84                               | .49-1.47  | .544 | .74                         | .46-1.18 | .204 | .66                               | .49-.89  | .007  | .488        |
| 12-mo follow-up           | 1.48                              | .79-2.77  | .225 | 1.23                              | .79-1.9   | .356 | .64                         | .4-1.03  | .066 | .58                               | .44-.76  | <.001 | .04         |
| 36-mo follow-up           | 2.15                              | 1.13-4.1  | .02  | 1.79                              | 1.06-3.02 | .03  | .56                         | .32-.98  | .041 | .5                                | .35-.73  | <.001 | .002        |
| Use of any antipsychotic  | OR                                |           |      | OR                                |           |      | OR                          |          |      | OR                                |          |       |             |
| Baseline                  | 1.35                              | .54-3.38  | .521 |                                   |           |      | 1.13                        | .6-2.12  | .697 |                                   |          |       | .753        |
| 6-mo follow-up            | .88                               | .36-2.16  | .775 | .65                               | .43-.97   | .035 | 1.08                        | .6-1.94  | .802 | .95                               | .67-1.36 | .787  | .701        |
| 12-mo follow-up           | 1.36                              | .61-3.03  | .448 | 1.01                              | .58-1.74  | .978 | .88                         | .48-1.64 | .69  | .78                               | .52-1.16 | .222  | .395        |
| 36-mo follow-up           | 2.11                              | .85-5.29  | .109 | 1.56                              | .63-3.87  | .332 | .72                         | .35-1.49 | .377 | .64                               | .37-1.1  | .106  | .074        |
| Appropriate treatment     | OR                                |           |      | OR                                |           |      | OR                          |          |      | OR                                |          |       |             |
| Baseline                  | 1.07                              | .6-1.92   | .807 |                                   |           |      | 1.12                        | .66-1.92 | .673 |                                   |          |       | .915        |
| 6-mo follow-up            | 1.01                              | .55-1.83  | .983 | .94                               | .44-1.98  | .863 | 1.14                        | .72-1.82 | .572 | 1.02                              | .68-1.53 | .929  | .738        |
| 12-mo follow-up           | 1.36                              | .83-2.23  | .222 | 1.27                              | .64-2.49  | .494 | .85                         | .59-1.22 | .379 | .76                               | .49-1.18 | .22   | .128        |
| 36-mo follow-up           | 1.84                              | 1.01-3.34 | .045 | 1.71                              | .8-3.66   | .165 | .63                         | .4-1     | .048 | .56                               | .3-1.05  | .073  | .005        |

<sup>a</sup>Longitudinal analyses used item level multiply imputed data (N=980 at baseline, 759 at 6 months, 733 at 12 months, and 600 at 36 months). A generalized estimating equation logistic regression model was used for a binary variable (presented as odds ratio) and generalized estimating equation Poisson regression model was used for a count variable (presented as incidence rate ratios), interacted of intervention condition by screening sector adjusted for age, race/ethnicity, 12-month depressive disorder, and community.

**Figure. Study flow diagram**

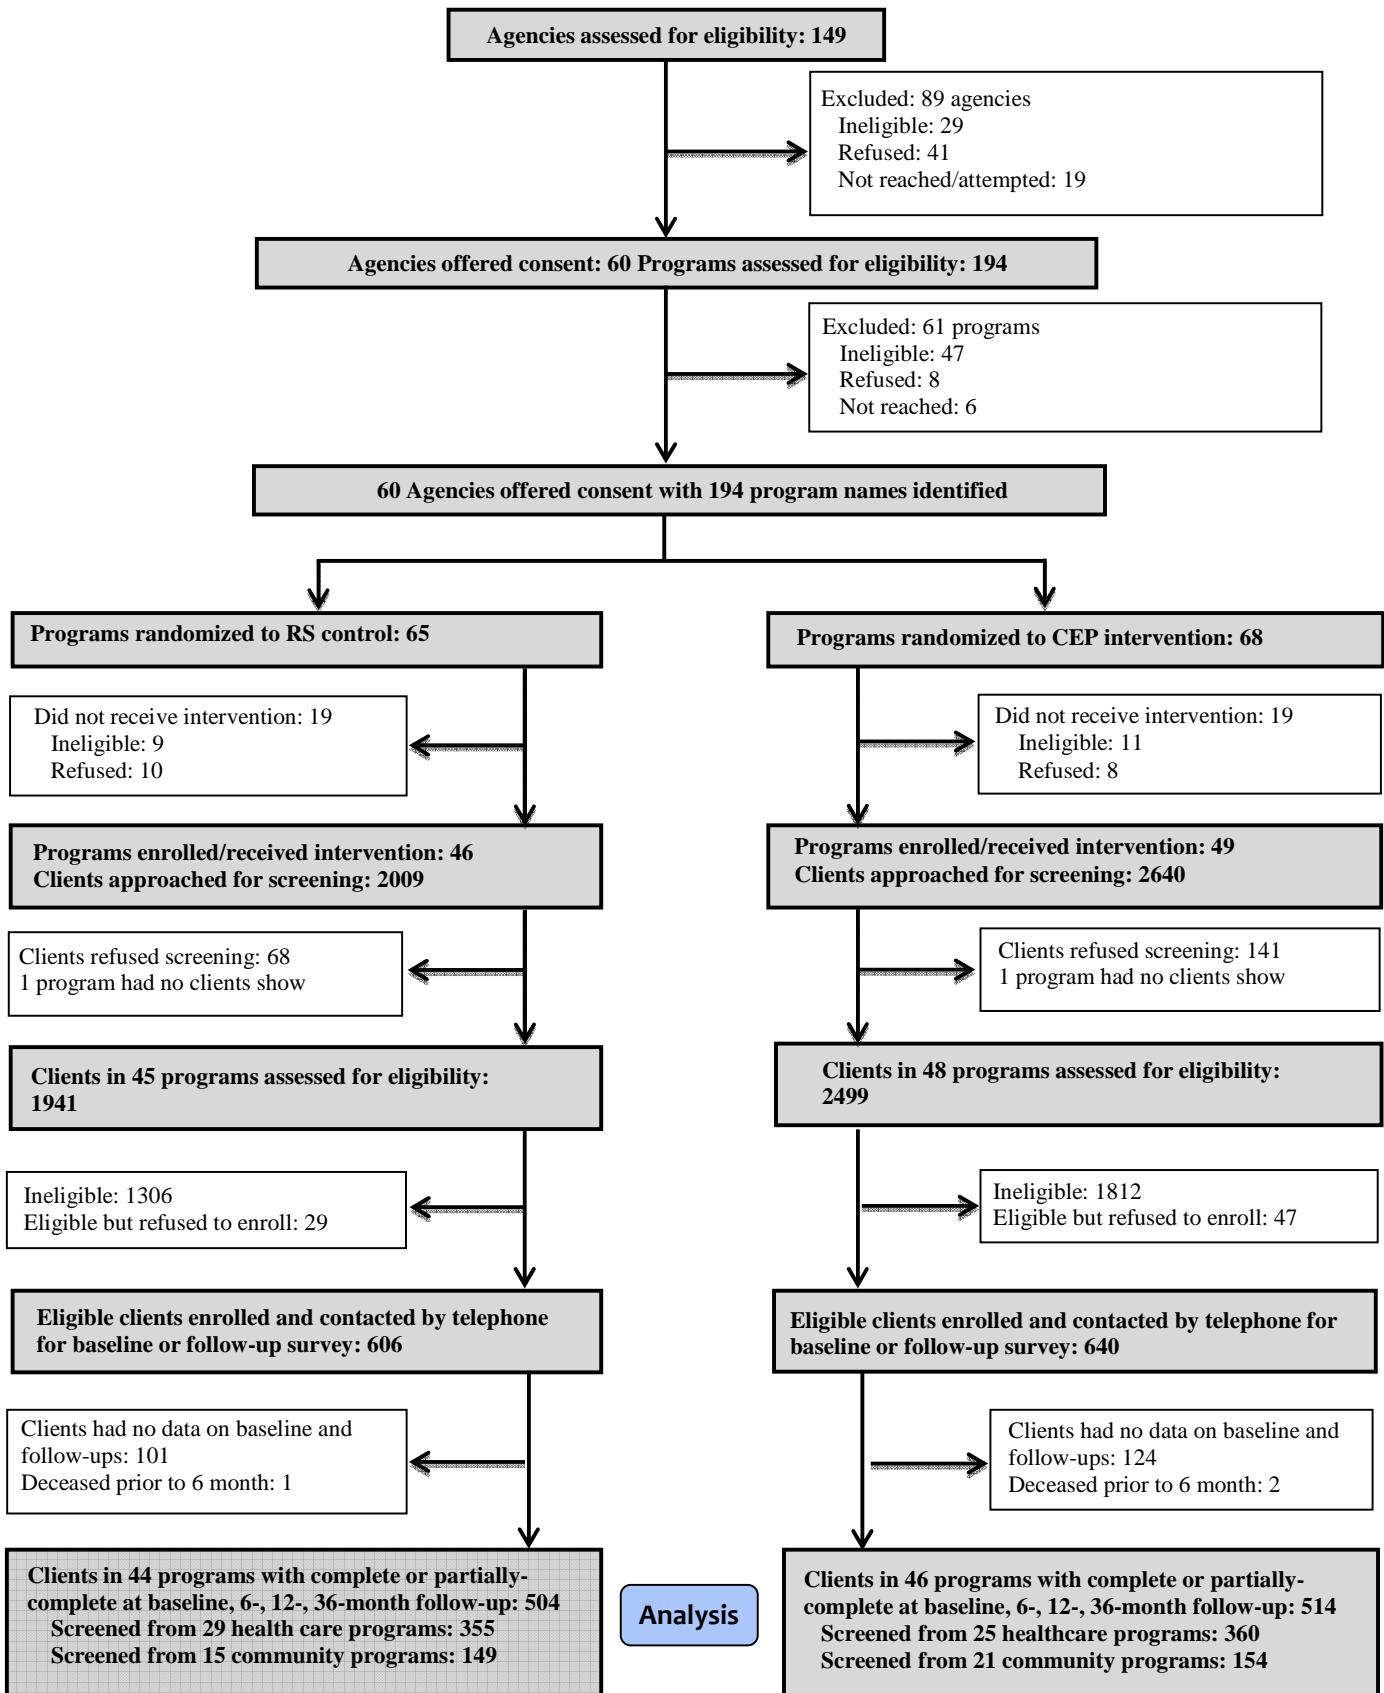

Five programs (2 in the RS group and 3 in the CEP group) had no clients with data for outcome analysis. CEP= community engagement and planning; RS = resources for services.



## References

1. Wells KB, Jones L, Chung B, et al.: Community-partnered cluster-randomized comparative effectiveness trial of community engagement and planning or resources for services to address depression disparities. *Journal of General Internal Medicine* 28:1268-78, 2013
2. Stockdale SE, Tang L, Pulido E, Lucas-Wright A, Chung B, Horta M, Masongsong Z, Jones F, Belin T, Sherbourne C, Wells KB. Sampling and Recruiting Community-based Programs Using Community-Partnered Participation Research. *Health Promotion Practice*. March 2016 Vol. 17, No. (2) 254–264
3. Chung B, Ong M, Ettner SL, et al.: 12-Month outcomes of community engagement versus technical assistance to implement depression collaborative care: a partnered, cluster, randomized, comparative effectiveness trial. *Annals of Internal Medicine* 161:S23-S34, 2014
4. Groves RM: *Survey nonresponse*: Wiley-Interscience, 2002
5. Korn EL, Graubard BI: *Analysis of Health Surveys*. Hoboken, New Jersey: Wiley-Interscience, 1999
6. Little RJ: Missing-data adjustments in large surveys. *Journal of Business & Economic Statistics* 6:287-96, 1988
7. Rubin DB: Inference and missing data. *Biometrika* 63:581-92, 1976
8. Schafer JL: *Analysis of incomplete multivariate data*: CRC press, 1997
9. Lavori PW, Dawson R, Shera D: A multiple imputation strategy for clinical trials with truncation of patient data. *Statistics in medicine* 14:1913-25, 1995
10. Tang L, Song J, Belin TR, et al.: A comparison of imputation methods in a longitudinal randomized clinical trial. *Statistics in medicine* 24:2111-28, 2005
11. Murray DM: *Design and analysis of group-randomized trials*: Oxford University Press, USA, 1998
12. Littell RM, G; Stroup, W; et al. : *SAS System for Mixed Models*. Cary, NC: SAS Institute, Inc, 1996
13. Liang KY, Zeger SL: Longitudinal data analysis using generalized linear models. *Biometrika* 73:13-22, 1986
